# Supplementary material for: Light and Primary Production Shape Bacterial Activity and Community Composition of Aerobic Anoxygenic Phototrophic Bacteria in a Microcosm Experiment
Source: PubMed Central journal article supplement (PMC7333569; doi:10.1128/msphere.00354-20), 2020-07-01
Supplement: mSphere.00354-20-sf001.pdf [file mSphere.00354-20-sf001.pdf]

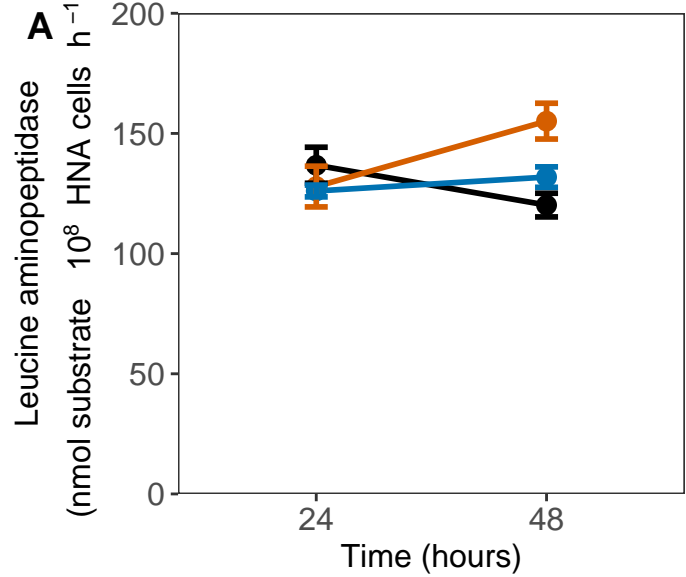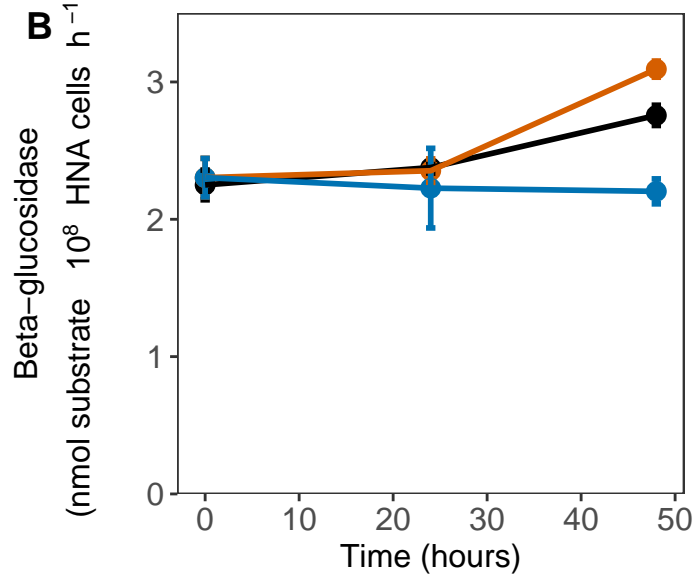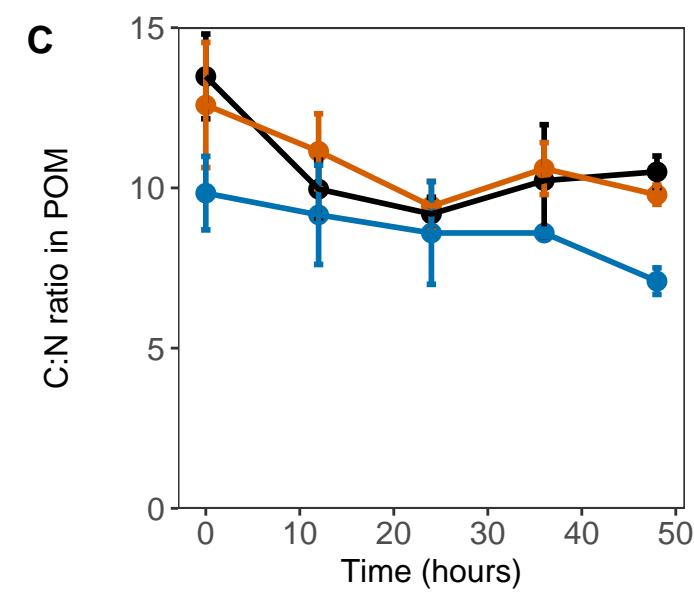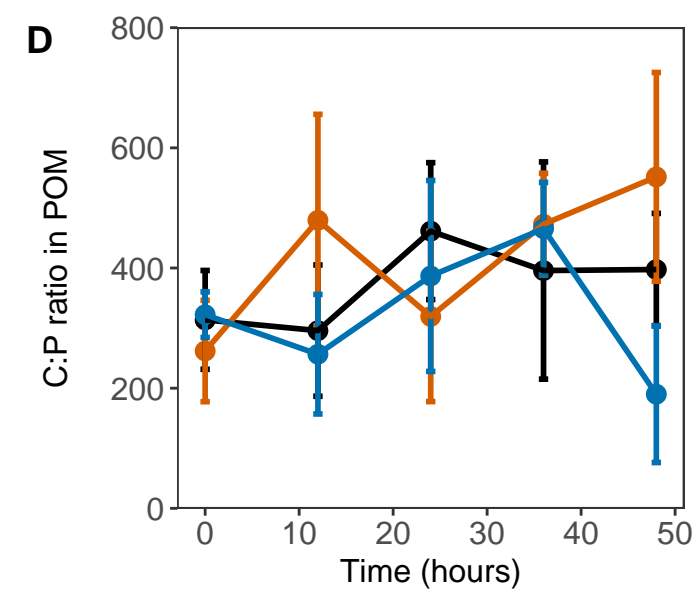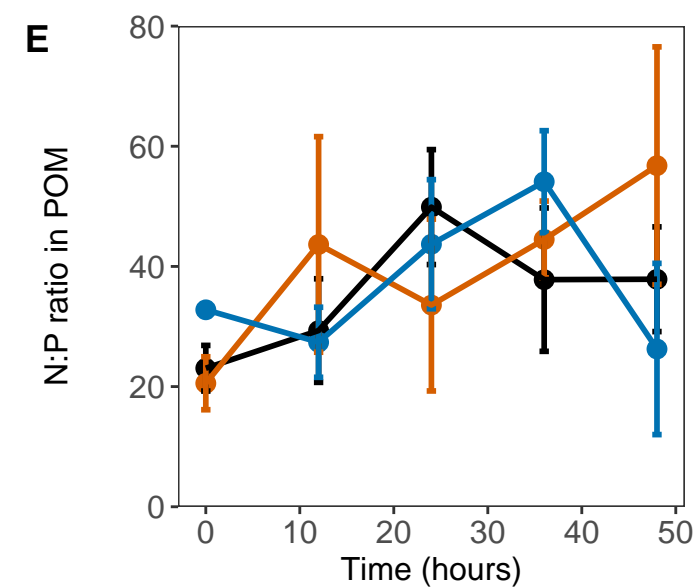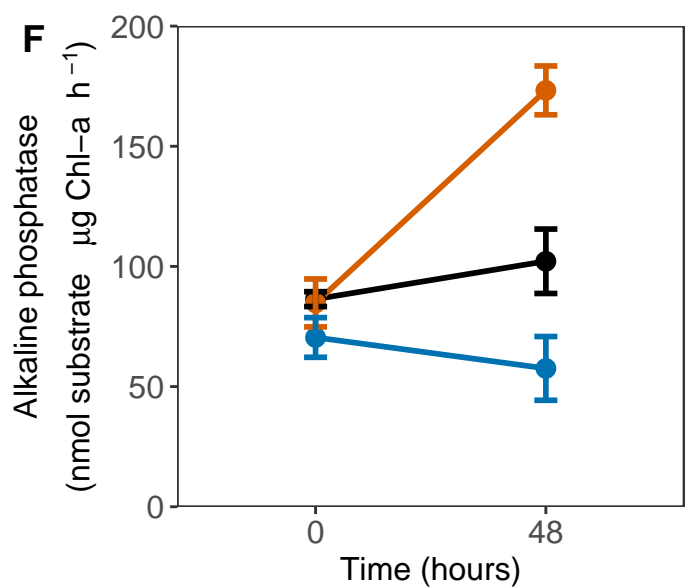

Treatment ■ Low Light ● Optimum Light ▲ Optimum Light + inhibitor
