# Supplementary material for: Light and Primary Production Shape Bacterial Activity and Community Composition of Aerobic Anoxygenic Phototrophic Bacteria in a Microcosm Experiment
Source: PubMed Central journal article supplement (PMC7333569; doi:10.1128/msphere.00354-20), 2020-07-01
Supplement: mSphere.00354-20-sf002.pdf [file mSphere.00354-20-sf002.pdf]

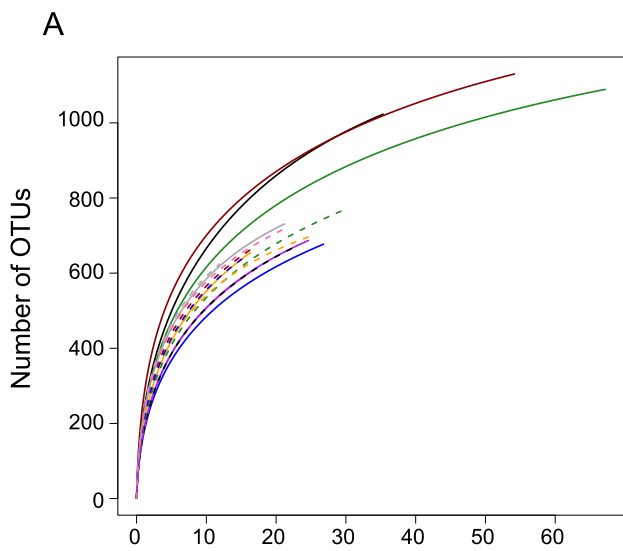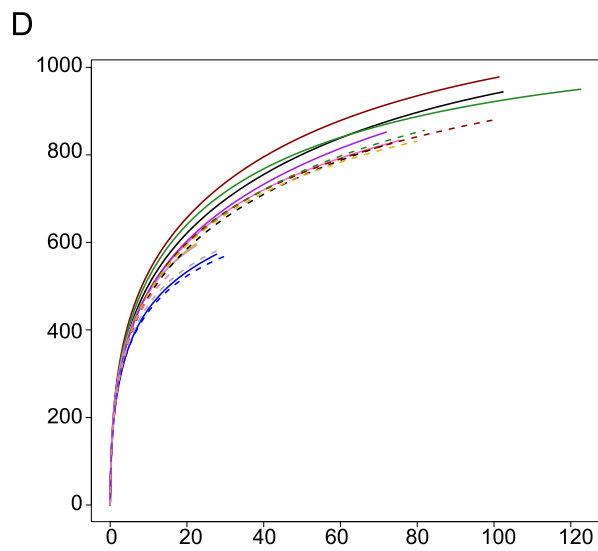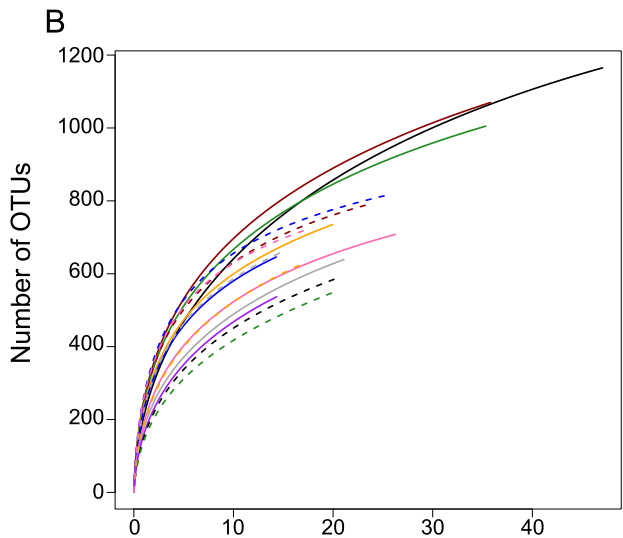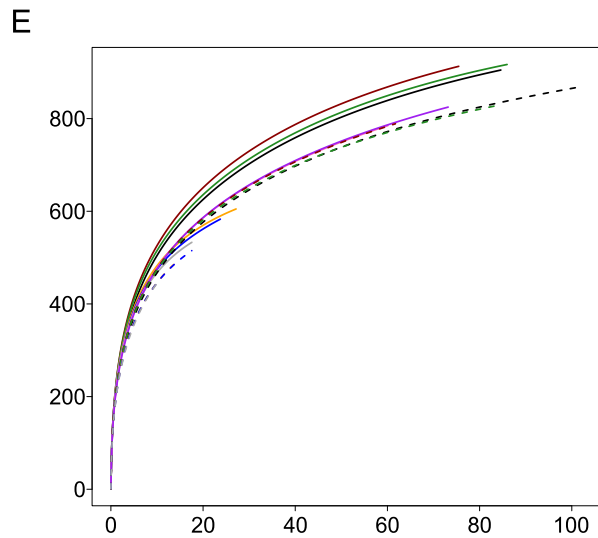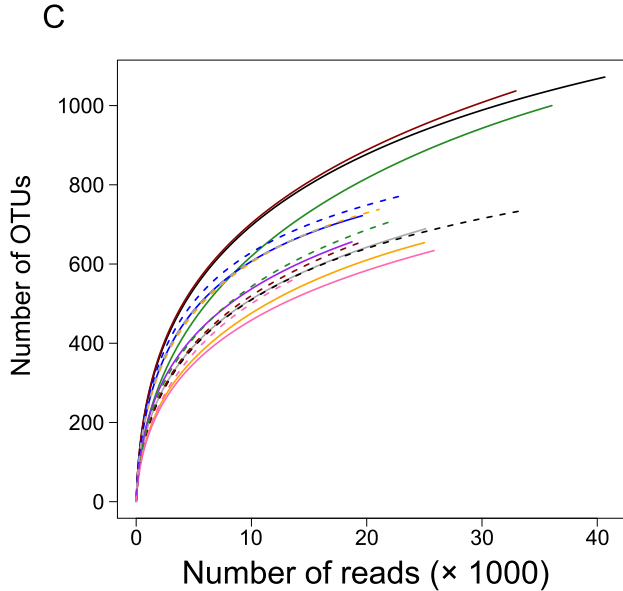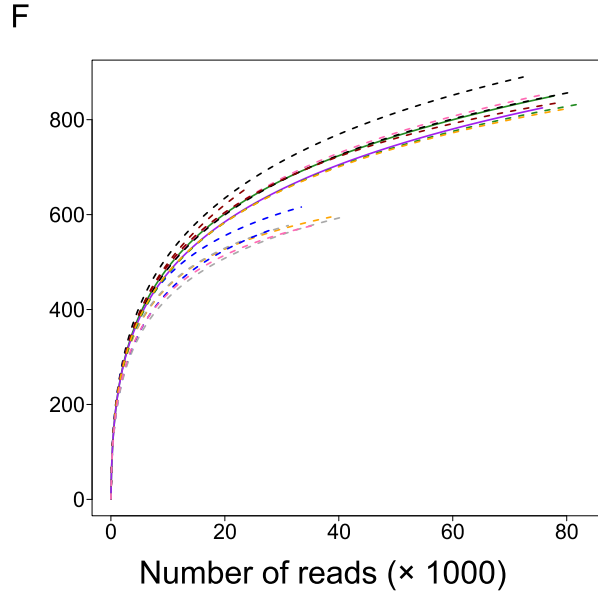

|        |         |           |           |           |
|--------|---------|-----------|-----------|-----------|
| — T0 A | — T12 A | — T24 A   | - - T36 A | - - T48 A |
| — T0 B | — T12 B | — T24 B   | - - T36 B | - - T48 B |
| — T0 C | — T12 C | - - T24 C | - - T36 C | - - T48 C |
