# Supplementary material for: Light and Primary Production Shape Bacterial Activity and Community Composition of Aerobic Anoxygenic Phototrophic Bacteria in a Microcosm Experiment
Source: PubMed Central journal article supplement (PMC7333569; doi:10.1128/msphere.00354-20), 2020-07-01
Supplement: mSphere.00354-20-st001.pdf [file mSphere.00354-20-st001.pdf]

**Supplementary Table S1.** Physical, chemical and biological conditions in the Římov Reservoir on August 21, 2017.

| Variable                           | Value                    |
|------------------------------------|--------------------------|
| Temperature                        | 21.9°C                   |
| pH                                 | 9.8                      |
| Dissolved organic carbon (DOC)     | 7.65 mg L <sup>-1</sup>  |
| Dissolved oxygen                   | 10.6 mg L <sup>-1</sup>  |
| NO <sub>3</sub> -N                 | 0.233 mg L <sup>-1</sup> |
| NH <sub>4</sub> -N                 | 23.58 µg L <sup>-1</sup> |
| Soluble reactive phosphorous (SRP) | 1.7 µg L <sup>-1</sup>   |
